# Supplementary material
Source: PubMed Central journal article supplement (PMC5827407)
Supplement: JVI.01647-17_zjv006183356s1.pdf [file JVI.01647-17_zjv006183356s1.pdf]

## SUPPLEMENTARY DATA

### Supplemental Table S1

#### siRNAs used in this study

| name          | sequence                   |
|---------------|----------------------------|
| control siRNA | GGCUACGUCCAGGAGCGCACCCdTdT |
| siAUF1        | AGAAAGATCTGAAGGACTAdTdT    |

### Supplemental Table S2

#### DNA oligonucleotides used in this study

| name                                                               | sequence                                         |
|--------------------------------------------------------------------|--------------------------------------------------|
| <b>SUMO expression plasmids</b>                                    |                                                  |
| NS5DENVFor                                                         | ATGGTCTCATGGTGGAAGTGGCAACATAGGAGAG               |
| NS5DENVRev                                                         | ACGGATCCCTACCACAGAAGTCTGCTTCTTCC                 |
| <b>cloning/amplification of cDNAs encoding different DENV RNAs</b> |                                                  |
| 3CycDENVFor                                                        | ATAAGCTTTAATACGACTCACTATAGGAAACAGCATATTGACGCTG   |
| 3UTRDENVPolyCA                                                     | GTGGGGGGTGGTGGGTGTAGAACCTGTTGATTCAACAGCACC       |
| 5UTRDENVFor                                                        | ATAAGCTTTAATACGACTCACTATAGGAGTTGTTAGTCTACGTGGACC |
| 5UTRDENVPolyCA                                                     | GTGGGGGGTGGTGGGTTCATCAGAGATCTGCTCTC              |
| DENVsgRNAFor                                                       | AAAGCAAACTAACATGAAACAAGG                         |
| DENVsgRNARev                                                       | TCAGCTGTTGCACAGTCGAC                             |
| 3UTRnativDENV                                                      | AGAACCTGTTGATTCAACAGCACC                         |
| <b>DENV qRT-PCR</b>                                                |                                                  |
| <i>Reverse transcription</i>                                       |                                                  |
| FLA VD8 rev                                                        | GGG TCT CCT CTA ACC TCT AG                       |
| <i>PCR</i>                                                         |                                                  |
| FLA EMF1 for                                                       | TGG ATG ACS ACK GAR GAY ATG                      |
| FLA VD8 rev                                                        | GGG TCT CCT CTA ACC TCT AG                       |
| <b>cloning/amplification of cDNAs encoding different ZIKV RNAs</b> |                                                  |
| 5'UTRZIKV_RT                                                       | TGATGGGCCCATGACCCAGC                             |

| <i>Supplemental Table S2 continued</i>                      |                                                    |
|-------------------------------------------------------------|----------------------------------------------------|
| 5UTRZIKVFor                                                 | ATAAGCTTTAATACGACTCACTATAGGAGTTGTTGATCTGTGTGAATCAG |
| 5UTRZIKVRev                                                 | ATCCCGGGCTACTCCGCGTTTTAGC                          |
| 5UTRZIKVPolyCA                                              | CCGTGTGTGTGTGTGTGTGTGTGACAATCCGGAATCCTCCG          |
| <b>ZIKV qRT-PCR</b>                                         |                                                    |
| ZIKA_for                                                    | GTCATGATACTGCTGATTGC                               |
| ZIKA_rev                                                    | GTGTCTGATTGCTTGTCAAG                               |
| ZIKA_FL                                                     | CCTTCCACAAAGTCCCTATTGCTGA-FL                       |
| ZIKA_LCRed640                                               | LC640-TCCTATGCACCTGATGCTGTATGC-PH                  |
| <b>Primer extension for RNA secondary structure probing</b> |                                                    |
| 3UTRDENVPolyCA_RT                                           | GTGGGGGGTGGTGGG                                    |
| PolyCA_RT                                                   | CCGTGTGTGTGTGTGTGTGT                               |

### Supplemental Table S3

#### RNA oligonucleotides used in this study

| <b>name</b>               | <b>sequence</b>                                     |
|---------------------------|-----------------------------------------------------|
| 3SL <sup>trunc</sup> DENV | Cy5-5'-AGA UCCUGCUGUCUCCUCGUUGAAUCAACAGGUUCU-3'-BHQ |
| 5UAR DENV                 | 5'-UUAGAGAGCAGAUCU-3'                               |
| SLB WNV                   | Cy5-5'-GUUUCUUAGCACGAAGAUCUCGAUGUCUAAGAAAC-3'-BHQ   |
| 3UAR WNV                  | 5'-UAGACUAGGAGAUCUUCUGCU-3'                         |
